# Supplementary material
Source: PubMed Central journal article supplement (PMC5537043)
Supplement: NIHMS831316-supplement-Supp_Fig_S2.pdf [file NIHMS831316-supplement-Supp_Fig_S2.pdf]

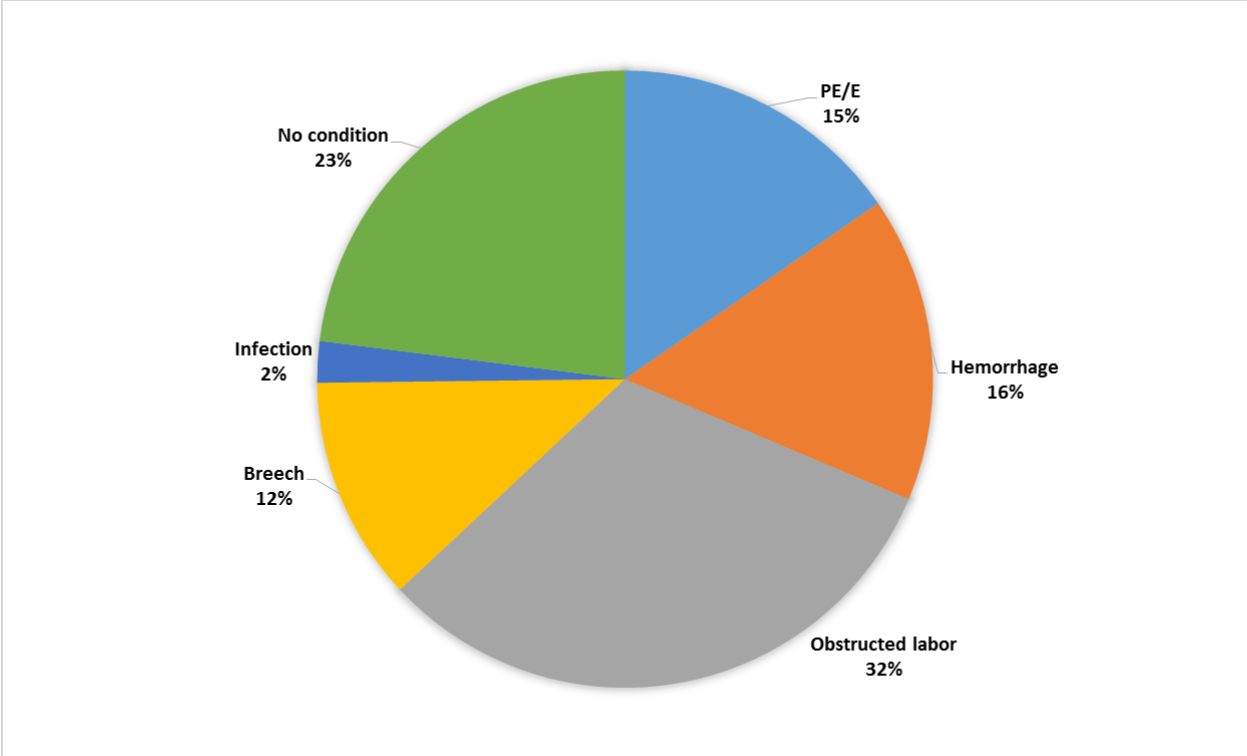

**Figure S2.** Maternal conditions present among stillbirths caused by asphyxia as determined by algorithm  
PE/E = preeclampsia/eclampsia
