# Supplementary material
Source: PubMed Central journal article supplement (PMC5537043)

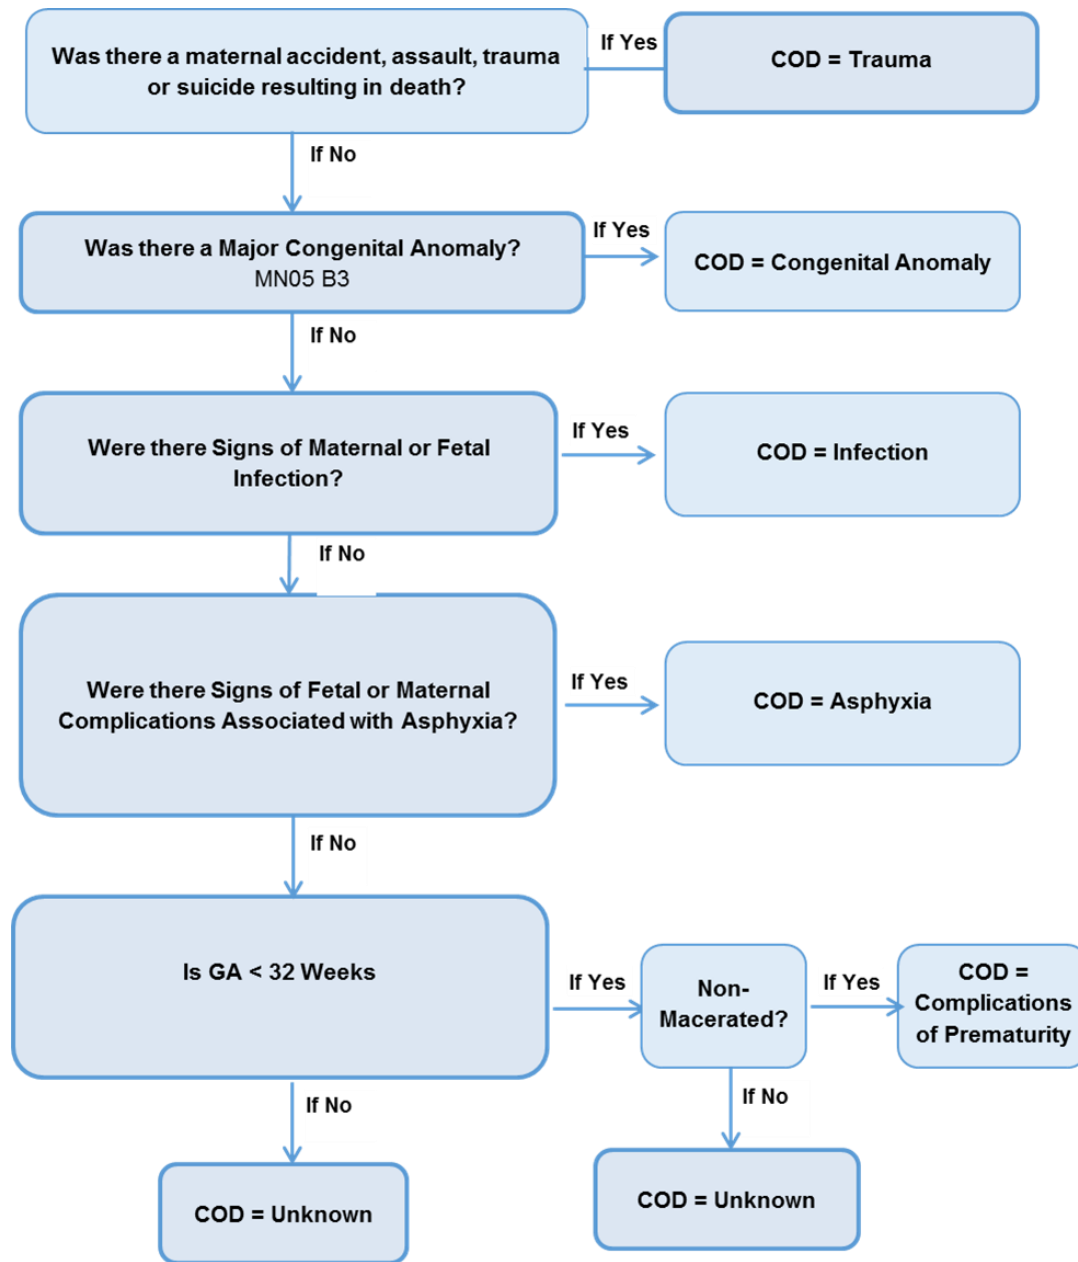

**Figure S1.** Global Network cause of stillbirth algorithm

Supplement: NIHMS831316-supplement-Supp_Fig_S1.pdf [file NIHMS831316-supplement-Supp_Fig_S1.pdf]
